# Supplementary material for: Evaluation of MTT Heterogeneity of Perfusion CT Imaging in the Early Brain Injury Phase: An Insight into aSAH Pathopysiology
Source: MDPI journal article supplement (doi:10.3390/brainsci13050824), 2023-05-19
Supplement: s1 [file s1]

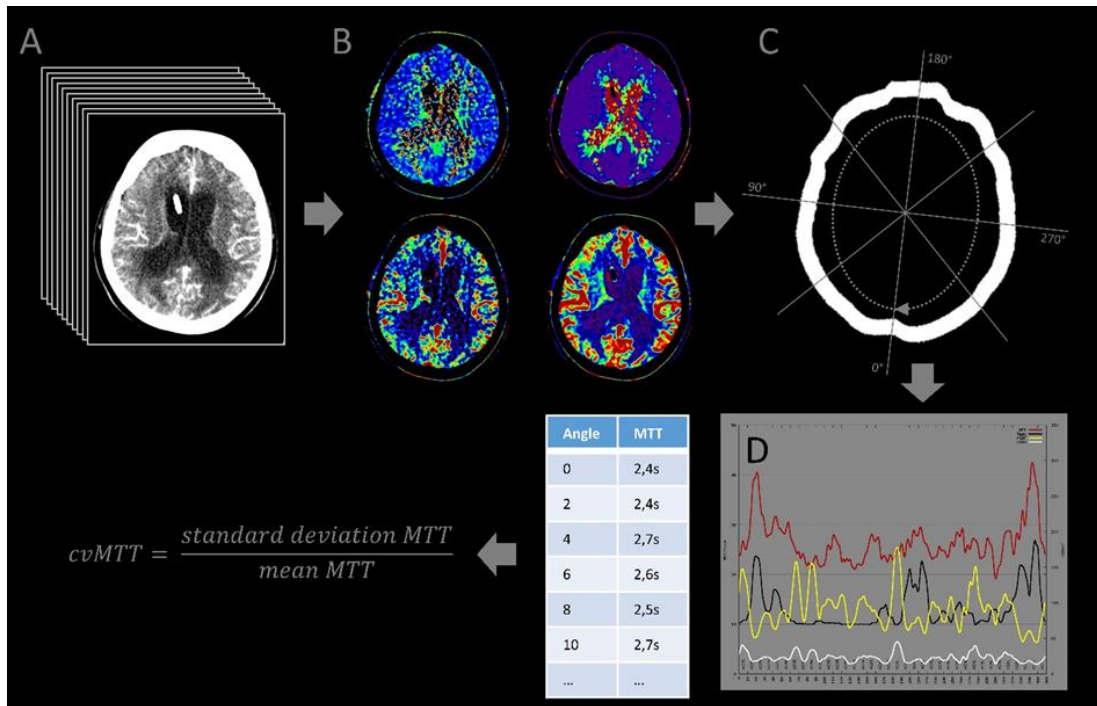

**Supplementary Figure S1 - Schematic representation of the early CTP image workflow.** A, Series of axial CTP scans positioned at the level of the central parts of lateral ventricles, parallel to a plane Table 10. in 2° steps). D, Representation as histogram of 180 measurements across 360° (red, MTT; black, Tmax; yellow, rCBF; white, rCBV). E, Example of the 180 individual values in numerical form, displayed from angle 0 to 10. F, Calculation of the cvMTT from the 180 individual values. *Adopted in modified form from Hofmann BB, Fischer I, Engel A, et al. MTT Heterogeneity in Perfusion CT Imaging as a Predictor of Outcome after Aneurysmal SAH. AJNR Am J Neuroradiol. 2021;42(8):1387-1395. doi:10.3174/ajnr.A7169.*
